# Supplementary material for: Sol–gel synthesis of defect-pyrochlore structured CsTaWO6 and the tribochemical influences on photocatalytic activity
Source: Royal Society of Chemistry journal article supplement (doi:10.1039/c3ra42768d), 2013-01-01
Supplement: c3ra42768d.pdf [file c3ra42768d.pdf]

## Electronic Supplementary Information to:

# Sol-gel synthesis of defect-pyrochlore structured CsTaWO<sub>6</sub> and the tribochemical influences on photocatalytic activity

Larissa Schwertmann<sup>a</sup>, Michael Wark<sup>a</sup> and Roland Marschall<sup>\*:a</sup>

Received (in XXX, XXX) Xth XXXXXXXXXX 20XX, Accepted Xth XXXXXXXXXX 20XX

DOI: 10.1039/b000000x

## Results and Discussion

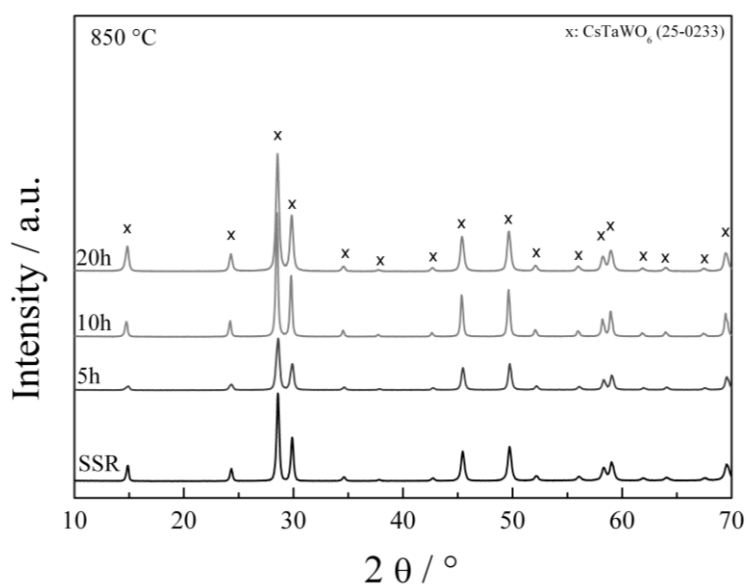

**Fig. SD01** XRD patterns after calcination of CsTaWO<sub>6</sub> at 850 °C for different lengths.

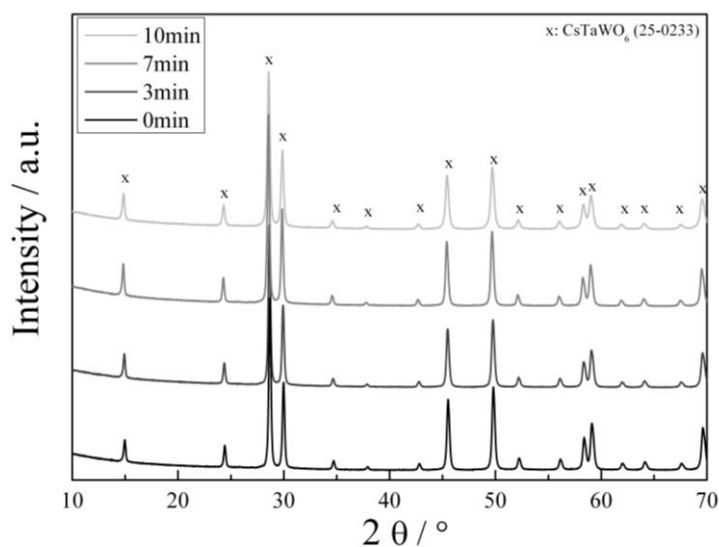

**Fig. SD02** XRD patterns after different ball milling times.

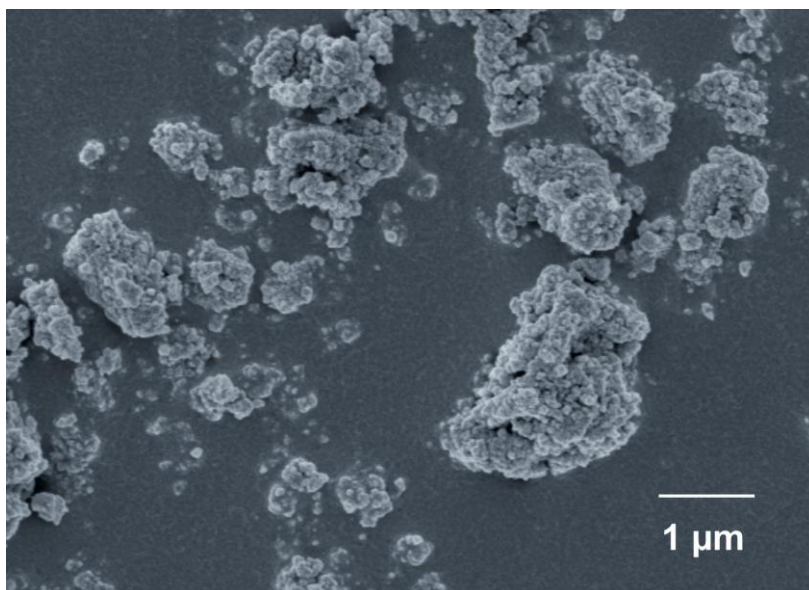

**Fig. SD03** SEM image of CsTaWO<sub>6</sub> after sol–gel synthesis and calcination at 850 °C for 20 hours, and 10 minutes ball milling.

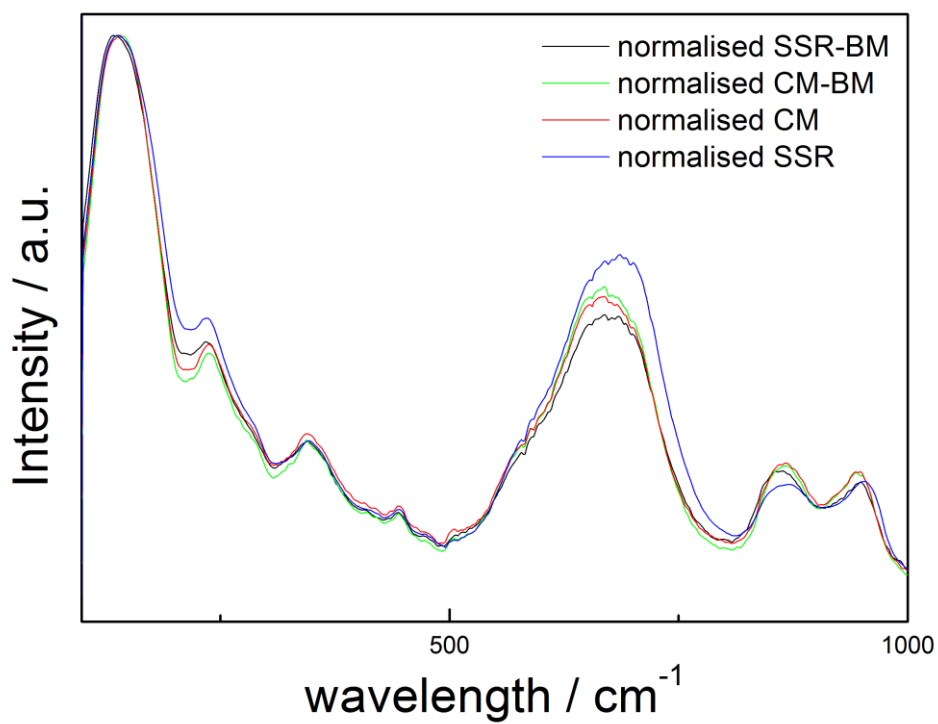

**Fig. SD04** Normalised Raman spectra of ball milled samples (SSR & 20 h 850°C) compared to the untreated powders.
